# Supplementary material for: Prediction of incidence of neurological disorders in HIV-infected persons in Taiwan: a nested case–control study
Source: PubMed Central journal article supplement (PMC10625280; doi:10.1186/s12879-023-08761-4), 2023-11-04
Supplement: 12879_2023_8761_MOESM1_ESM.pdf [file 12879_2023_8761_MOESM1_ESM.pdf]

Supplementary Table 1. ICD-9 and ICD-10 codes used for neurological disorders and covariates

| Description                             | ICD-9 codes                                                                                                                                                      | ICD-10 codes                                                                                                                                                                                                                                                                                                    |
|-----------------------------------------|------------------------------------------------------------------------------------------------------------------------------------------------------------------|-----------------------------------------------------------------------------------------------------------------------------------------------------------------------------------------------------------------------------------------------------------------------------------------------------------------|
| HIV infection                           | 042                                                                                                                                                              | B20                                                                                                                                                                                                                                                                                                             |
| Cognitive disorders                     | 290, 293, 294, 331, 332.1, 333.0, 345., 348.3, 780.3x                                                                                                            | F03, F04, F05, F0150, F0151, F06x, F06xx, F0280, F0281, G138, G21x, G2111, G2119, G23x, G30x, G311, G312, G318x, G319, G20, G903, G40xx, G40xxx, G934x, R569, R5600, R5601                                                                                                                                      |
| CNS infection                           | 013, 036, 045, 046, 047, 048, 049, 052.0, 053.0, 053.1, 054.3, 054.72, 055.0, 056, 062, 063, 064, 098.82, 100.81, 139.0, 320, 321, 322, 323, 324, 326            | A170, A171, A178, A179, A2781, A390, A3981, A5481, A80, A81xx, A83, A84, A85, A86, A87, A89, B0111, B010, B0112, B020, B021, B0229, B0221-B0224, B0229, B004, B1001, B1009, B003, B0082, B050, B051, B0600, B0601, B0602, B451, B060x, , B941, G00, G01, G02, G03, G04, G05, G06, G07, G08, G09, G373, G06, G92 |
| Dyslipidemia                            | 272.0-272.4                                                                                                                                                      | E780-E785                                                                                                                                                                                                                                                                                                       |
| Hepatitis C infection                   | 070.41, 070.44, 070.51, 070.54                                                                                                                                   | B1719, B1711, B182, B1920, B1921                                                                                                                                                                                                                                                                                |
| Substance use                           | 292, 304, 305, E935.0                                                                                                                                            | F11, F12, F13, F14, F15, F16, F17, F18, F19                                                                                                                                                                                                                                                                     |
| Alcoholism                              | 291, 303, 305.0x, 357.5, V11.3                                                                                                                                   | F10, G621                                                                                                                                                                                                                                                                                                       |
| Traumatic brain injury                  | 800, 801, 850, 851                                                                                                                                               | G913, S064x0A, S060, S065, S066, S063, S069x9A                                                                                                                                                                                                                                                                  |
| Sleep apnea                             | 780.5                                                                                                                                                            | G473                                                                                                                                                                                                                                                                                                            |
| Sexually transmitted disease            | 091, 092, 093, 094, 095, 096, 097, 098, 099                                                                                                                      | A510, A5209, A521, A522, A523, A527, A528, A529, A530, A539, A54, A55, A56, A57, A58, A638, A64                                                                                                                                                                                                                 |
| Diabetes mellitus                       | 250                                                                                                                                                              | E10xx, E10xxx, E108, E109, E11                                                                                                                                                                                                                                                                                  |
| Psychiatric illness                     | 295, 296, 297, 298, 299, 300, 301, 306, 307.1, 307.5, 308, 309, 310, 311, 312, 313, 314                                                                          | F0789, F079, F09, F20, F21, F22, F23, F24, F25, F28, F3xx, F3xxx, F4xx, F4xxx, F42, F502, F509, F60, F63, F84, F99, F9xx                                                                                                                                                                                        |
| HIV-associated opportunistic infections | 002, 003, 007.4, 010, 012, 014, 015, 016, 017, 018, 031, 046.3, 054, 078.5, 112, 114, 115, 117.5, 130, 136.3, 137, 176, 180, 200, 481, 482, 483, 484.1, 485, 486 | A01, A02, A072, A073, A15, A18, A19, A31, A812, B001, B005, B007, B008, B250, B258, B259, B37, B38, B39, B45, B46, B58, B59, B90, C53, C830, C837, J13, J14, J15, J160, J168, J18                                                                                                                               |
